# Supplementary material
Source: PubMed Central journal article supplement (PMC3283885)
Supplement: 97320630008134S1.pdf [file 97320630008134S1.pdf]

## Supplementary material:

**Table 1:** Unique enzymes, which are only present in *T. gondii* and homologs are absent in humans.

| S. No. | Metabolic Pathway                                   | Enzyme                                                                           | Enzyme Detail                                                                                                                                                                 | <i>T. gondii</i> Gene I.D.                                                        |
|--------|-----------------------------------------------------|----------------------------------------------------------------------------------|-------------------------------------------------------------------------------------------------------------------------------------------------------------------------------|-----------------------------------------------------------------------------------|
| 1.     | Glycolysis Gluconeogenesis                          | [EC:4.1.1.49]                                                                    | Phosphoenolpyruvate carboxykinase                                                                                                                                             | TGME49_089930                                                                     |
| 2.     | Citrate Cycle (TCA cycle)                           | [EC:4.1.1.49]                                                                    | Phosphoenolpyruvate carboxykinase                                                                                                                                             | TGME49_089650                                                                     |
| 3.     | Fatty Acid Biosynthesis                             | [EC:2.3.1.180]<br>[EC: 4.2.1.-]<br>[EC:1.3.1.9]                                  | 3-Oxoacyl-(acyl-carrier-protein) synthase III family protein;<br>(3R)-Hydroxymyristoyl ACP dehydratase;<br>Enoyl-acyl carrier reductase                                       | TGME49_031890<br>TGME49_121570<br>TGME49_051930                                   |
| 4.     | Oxidative Phosphorylation                           | [EC:1.6.99.3]<br>[EC:3.6.3.6]                                                    | Mitochondrial alternative NADH dehydrogenase 1; Pyridine nucleotide-disulphide oxidoreductase; Plasma-membrane H <sup>+</sup> -ATPase                                         | TGME49_009150<br>TGME49_088830<br>TGME49_052640<br>TGME49_084600                  |
| 5.     | Purine Metabolism                                   | (EC:3.2.1.3)<br>[EC:2.7.7.4]                                                     | SIN-like domain-containing protein;<br>Sulfate adenyltransferase-adenylsulfate kinase                                                                                         | TGME49_064460<br>TGME49_082230                                                    |
| 6.     | Pyrimidine Metabolism                               | [EC:3.5.2.3]<br>(EC:3.2.1.3);<br>[EC:2.1.1.451.5.1.3]                            | Dihydroorotase protein;<br>SIN-like domain-containing protein; Bifunctional dihydrofolate reductase / thymidylate synthase                                                    | TGME49_093610<br>TGME49_064460<br>TGME49_049180                                   |
| 7.     | Alanine, Aspartate and Glutamate Metabolism         | [EC:2.1.3.2]<br>[EC:1.4.1.2]<br>[EC:1.4.1.4]                                     | Aspartate carbamoyltransferase; NAD-specific glutamate dehydrogenase                                                                                                          | TGME49_091640<br>TGME49_049390<br>TGME49_093180                                   |
| 8.     | Glycine, Serine and Threonine Metabolism            | [EC:2.7.2.4]<br>[EC:1.2.1.11]<br>[EC:2.7.1.39]<br>[EC:4.2.3.1]                   | Aspartate kinase; Aspartate-semialdehyde dehydrogenase; Homoserine kinase; Threonine synthase                                                                                 | TGME49_027090<br>TGME49_005420<br>TGME49_016640<br>TGME49_020840                  |
| 9.     | Cysteine and Methionine Metabolism                  | [EC:2.5.1.47]<br>[EC:2.1.1.10]<br>[EC:2.7.2.4]<br>[EC:1.2.1.11]<br>[EC:2.3.1.31] | O-acetylserine (thiol) lyase; Cysteine synthase A; Homocysteine S-methyltransferase-1; Aspartate kinase; Aspartate-semialdehyde dehydrogenase; Homoserine O-acetyltransferase | TGME49_078910<br>TGME49_057750<br>TGME49_027090<br>TGME49_005420<br>TGME49_120730 |
| 10.    | Lysine Biosynthesis                                 | [EC:2.7.2.4]<br>[EC:1.2.1.11]                                                    | Aspartate kinase; Aspartate-semialdehyde dehydrogenase                                                                                                                        | TGME49_027090<br>TGME49_005420                                                    |
| 11.    | Arginine and Proline Metabolism                     | [EC:1.4.1.4]                                                                     | NADP-specific glutamate dehydrogenase                                                                                                                                         | TGME49_093180                                                                     |
| 12.    | Phenylalanine, Tyrosine and Tryptophan Biosynthesis | [EC:4.2.3.5]<br>[EC:2.5.1.54]                                                    | Chorismate synthase; DAHP synthetase                                                                                                                                          | TGME49_001380<br>TGME49_021260                                                    |
| 13.    | Beta-Alanine Metabolism                             | [EC:6.3.2.1]                                                                     | Pantoate--beta-alanine ligase                                                                                                                                                 | TGME49_065870                                                                     |
| 14.    | Seleno-compound Metabolism                          | [EC:2.7.7.4]                                                                     | Sulfate adenyltransferase-adenylsulfate kinase                                                                                                                                | TGME49_082230                                                                     |
| 15.    | Starch and Sucrose Metabolism                       | [EC:2.4.1.34]<br>[EC:2.4.1.15]<br>[EC:2.4.1.21]                                  | 1,3-beta-glucan synthase; Trehalose-6-phosphate synthase domain-containing protein; Glycogen synthase                                                                         | TGME49_078110<br>TGME49_097720<br>TGME49_022720                                   |
| 16.    | Amino Sugar and Nucleotide Sugar Metabolism         | [EC:2.7.7.64]                                                                    | UDP-N-acetylglucosamine pyrophosphorylase                                                                                                                                     | TGME49_018200                                                                     |
| 17.    | Glycosphingolipid Biosynthesis - globo series       | [EC: 2.3.1.-]                                                                    | Acetyl-CoA transporter                                                                                                                                                        | TGME49_015940                                                                     |
| 18.    | Pyruvate Metabolism                                 | [EC:4.4.1.5]<br>[EC:4.1.1.49]                                                    | Lactoylglycyl-L-homoserine lyase; Phosphoenolpyruvate carboxykinase                                                                                                           | TGME49_048400<br>TGME49_089930<br>TGME49_089650                                   |
| 19.    | Butanoate Metabolism                                | [EC:1.1.1.157]                                                                   | 3-Hydroxybutyryl-CoA dehydrogenase                                                                                                                                            | TGME49_032090                                                                     |
| 20.    | Vitamin B6 Metabolism                               | [EC:2.7.1.35]<br>[EC:4.2.3.1]<br>[EC: 4.-.-]<br>[EC: 2.6.-.-]                    | Hypothetical protein; Threonine synthase;<br>Ethylene inducible protein; Glutamine amidotransferase                                                                           | TGME49_097080<br>TGME49_020840<br>TGME49_037140<br>TGME49_081490                  |
| 21.    | Nicotinate and Nicotinamide Metabolism              | [EC:2.7.1.23]<br>[EC:1.6.1.1]                                                    | ATP-NAD kinase domain-containing protein; Transhydrogenase                                                                                                                    | TGME49_044700<br>TGME49_118650                                                    |
| 22.    | Pantothenate and CoA-Biosynthesis                   | [EC:6.3.2.1]                                                                     | Pantoate--beta-alanine ligase                                                                                                                                                 | TGME49_065870                                                                     |
| 23.    | Lipoic acid Metabolism                              | [EC:2.7.7.63]                                                                    | Lipoate-protein ligase A                                                                                                                                                      | TGME49_071820                                                                     |
| 24.    | Folate Biosynthesis                                 | [EC:2.5.1.15]<br>[EC:2.7.6.3]<br>[EC:2.6.1.85]                                   | Hydroxymethyl-dihydropterin; Pyrophosphokinase-dihydropteroate synthase; Para-aminobenzoate synthase                                                                          | TGME49_059550<br>TGME49_002920                                                    |
| 25.    | Porphyrin and Chlorophyll Metabolism                | [EC:1.3.99.22]<br>[EC:4.4.1.17]                                                  | Radical SAM domain containing protein; Coproporphyrinogen III oxidase; Cytochrome c heme lyase;                                                                               | TGME49_088640<br>TGME49_114040                                                    |

|     |                                         |          |                                                                  |                                                                                                                                                                                                         |                                                                  |
|-----|-----------------------------------------|----------|------------------------------------------------------------------|---------------------------------------------------------------------------------------------------------------------------------------------------------------------------------------------------------|------------------------------------------------------------------|
| 26. | Terpenoid Biosynthesis                  | Backbone | [EC:2.2.1.7]<br>[EC:1.1.1.267]<br>[EC:4.6.1.12]<br>[EC:1.17.1.2] | 1-deoxy-D-xylulose 5-phosphate synthase;<br>1-deoxy-D-xylulose 5-phosphate reductoisomerase; 2C-methyl-D-erythritol 2; lytB domain-containing protein, Hydroxy-3-methylbut-2-enyl diphosphate reductase | TGME49_008820<br>TGME49_014850<br>TGME49_055690<br>TGME49_027420 |
| 27. | Nitrogen Metabolism                     |          | [EC:1.4.1.4]                                                     | NADP-specific glutamate dehydrogenase                                                                                                                                                                   | TGME49_093180                                                    |
| 28. | Sulfur Metabolism                       |          | [EC:2.3.1.31]<br>[EC:2.5.1.47]                                   | Homoserine O-acetyltransferase;<br>O-acetylserine (thiol) lyase                                                                                                                                         | TGME49_120730<br>TGME49_078910                                   |
| 29. | Biosynthesis of Unsaturated Fatty Acids |          | [EC:1.1.1.100]                                                   | Oxoacyl-ACP reductase                                                                                                                                                                                   | TGME49_017740                                                    |

**Table 2:** Enzymes, which are present in more than one pathway in *T. gondii* and absent in humans.

| S. No. | <i>T. gondii</i> Gene I.D. | Enzyme                                         | Metabolic Pathway                                                                                              | Function                                                                                                                                                                                                                                                                                       |
|--------|----------------------------|------------------------------------------------|----------------------------------------------------------------------------------------------------------------|------------------------------------------------------------------------------------------------------------------------------------------------------------------------------------------------------------------------------------------------------------------------------------------------|
| 1.     | TGME49_089930              | Phosphoenolpyruvate Carboxykinase              | 1. Glycolysis / Gluconeogenesis<br>2. Pyruvate Metabolism                                                      | Phosphoenolpyruvate carboxykinase (PEPCK) is an enzyme in the lyase family used in the metabolic pathway of gluconeogenesis. It converts oxaloacetate into phosphoenolpyruvate and carbon dioxide.                                                                                             |
| 2.     | TGME49_089650              | Phosphoenolpyruvate Carboxykinase              | 1. Citrate cycle (TCA cycle)<br>2. Pyruvate Metabolism                                                         | Phosphoenolpyruvate carboxykinase (PEPCK) is an enzyme in the lyase family used in the metabolic pathway of gluconeogenesis. It converts oxaloacetate into phosphoenolpyruvate and carbon dioxide.                                                                                             |
| 3.     | TGME49_093180              | NAD-specific glutamate dehydrogenase           | 1. Alanine, Aspartate and Glutamate Metabolism<br>2. Arginine and Proline Metabolism<br>3. Nitrogen Metabolism | (GLDH) is an enzyme, present in most microbes and the mitochondria of eukaryotes, required for urea synthesis, that converts glutamate to $\alpha$ -Ketoglutarate, and vice versa.                                                                                                             |
| 4.     | TGME49_027090              | Aspartate kinase                               | 1. Glycine, Serine and threonine Metabolism<br>2. Cysteine and Methionine Metabolism<br>3. Lysine Biosynthesis | Catalyzes the phosphorylation of the amino acid aspartate. This reaction is the first step in the biosynthesis of three essential amino acids: methionine, lysine, and threonine, known as the "aspartate family".                                                                             |
| 5.     | TGME49_005420              | Aspartate-semialdehyde dehydrogenase           | 1. Glycine, Serine and Threonine Metabolism<br>2. Cysteine and Methionine Metabolism<br>3. Lysine Biosynthesis | It forms an early branch point in the metabolic pathway forming lysine, methionine, leucine and isoleucine from aspartate. This enzyme belongs to the family of oxidoreductases, specifically those acting on the aldehyde or oxo group of donor with NAD+ or NADP+ as acceptor.               |
| 6.     | TGME49_020840              | Threonine synthase                             | 1. Glycine, Serine and Threonine Metabolism<br>2. Vitamin B6 Metabolism                                        | This enzyme belongs to the family of lyases, specifically those carbon-oxygen lyases acting on phosphates.                                                                                                                                                                                     |
| 7.     | TGME49_078910              | O-acetylserine (thiol) lyase                   | 1. Cysteine and Methionine Metabolism<br>2. Sulfur Metabolism                                                  | The enzyme O-acetylserine (thiol)-lyase, using sulfide sources, converts O-acetylserine ester into cysteine, releasing acetate                                                                                                                                                                 |
| 8.     | TGME49_120730              | Homoserine O-acetyltransferase                 | 1. Cysteine and Methionine Metabolism<br>2. Sulfur Metabolism                                                  | This enzyme belongs to the family of transferases, specifically those acyltransferases transferring groups other than aminoacyl groups. The two substrates of this enzyme are acetyl-CoA and L-homoserine, whereas its two products are CoA and O-acetyl-L-homoserine.                         |
| 9.     | TGME49_065870              | Pantoate--beta-alanine ligase                  | 1. Beta-Alanine Metabolism<br>2. Pantothenate and CoA biosynthesis                                             | This enzyme belongs to the family of ligases, specifically those forming carbon-nitrogen bonds as acid-D-amino-acid ligases (peptide synthases). The 3 substrates of this enzyme are ATP, (R)- pantoate, and beta-alanine, whereas its 3 products are AMP, diphosphate, and (R)- pantothenate. |
| 10.    | TGME49_082230              | Sulfate adenyltransferase-adenylsulfate kinase | 1. Purine Metabolism<br>2. Selenocompound Metabolism                                                           | This enzyme belongs to the family of transferases, specifically those transferring phosphorus-containing nucleotide groups (nucleotidyltransferases). The two substrates of this enzyme are ATP and sulfate, whereas its two products are diphosphate and adenylsulfate.                       |
| 11.    | TGME49_064460              | SIN-like domain-containing protein             | 1. Purine Metabolism<br>2. Pyrimidine Metabolism                                                               | Utilizes a DNA template, i.e. the catalysis of DNA-template-directed extension of the 3'-end of an RNA strand by one nucleotide at a time.                                                                                                                                                     |

**Table 3:** Top ten ligand molecules identified from NCI diversity subset II of the ZINC database after virtual screening

| S. No. | ZINC ID of the screened molecules | Energy score (Kcal/Mol) | No. of Hydrogen Interaction of ligand with active site residues | No. Hydrophobic Interaction of ligand with active site residues | Molecular Weight (g/mol) | Log P value |
|--------|-----------------------------------|-------------------------|-----------------------------------------------------------------|-----------------------------------------------------------------|--------------------------|-------------|
| 1.     | ZINC01690699                      | -9.1                    | 2                                                               | 9                                                               | 548.59336                | 6.0         |
| 2.     | ZINC17465979                      | -8.1                    | 5                                                               | 5                                                               | 546.52144                | 5.9         |
| 3.     | ZINC17465983                      | -7.9                    | 4                                                               | 5                                                               | 546.52144                | 5.9         |
| 4.     | ZINC18141294_03                   | -7.9                    | 3                                                               | 8                                                               | 453.47264                | 5.3         |
| 5.     | ZINC05462670                      | -7.9                    | 4                                                               | 5                                                               | 546.52144                | 5.9         |
| 6.     | ZINC01572309                      | -7.9                    | 3                                                               | 5                                                               | 474.55802                | 5.0         |
| 7.     | ZINC18055497_01                   | -7.8                    | 1                                                               | 7                                                               | 479.67574                | 4.7         |
| 8.     | ZINC18141294                      | -7.8                    | 1                                                               | 12                                                              | 453.47264                | 5.3         |
| 9.     | ZINC05462674                      | -7.8                    | 4                                                               | 6                                                               | 546.52144                | 5.9         |
| 10.    | ZINC13152284_01                   | -7.8                    | 1                                                               | 7                                                               | 392.4492                 | 6.7         |
